# Supplementary material
Source: publisher figshare collection journal article supplement (https://acs.figshare.com/ndownloader/files/3872938)
Supplement: Supplementary file 1 [file 3872938]

# **Supporting Information**

## **Spatiotemporal Monitoring Endocytic and Cytosolic pH Gradients with Endosomal Escaping pH-Responsive Micellar Nanocarriers**

**Jinming Hu, Guhuan Liu, Cheng Wang, Tao Liu, Guoying Zhang, and Shiyong Liu\***

*CAS Key Laboratory of Soft Matter Chemistry, Hefei National Laboratory for Physical Sciences at the Microscale, Department of Polymer Science and Engineering, University of Science and Technology of China, Hefei, Anhui 230026, China*

\* To whom correspondence should be addressed. E-mail: [sliu@ustc.edu.cn](mailto:sliu@ustc.edu.cn)

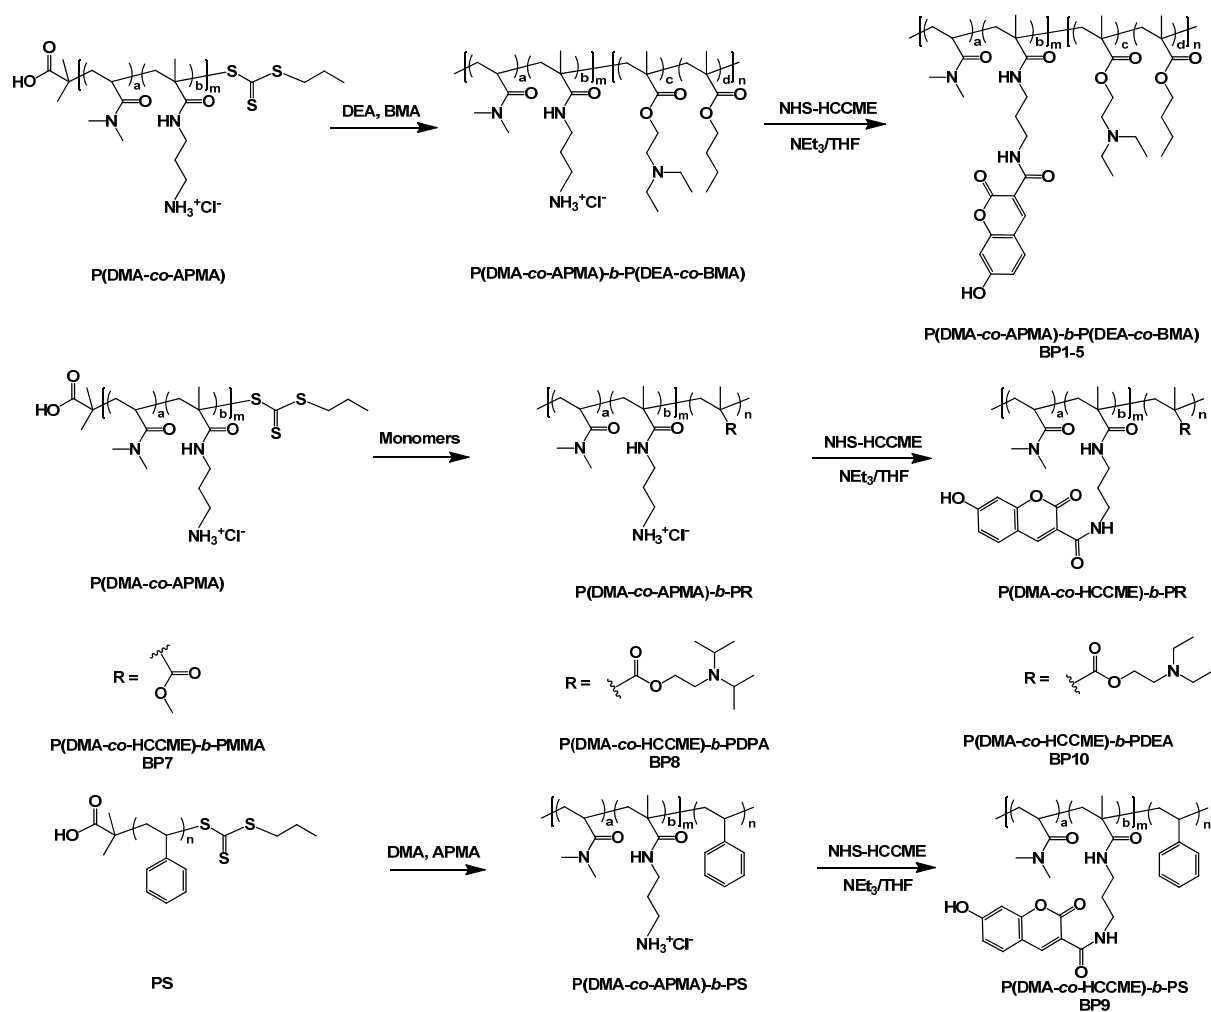

**Scheme S1.** Synthetic routes employed for the preparation of HCCME-labeled diblock copolymers, P(DMA-co-HCCME)-*b*-P(DEA-co-BMA) with varying BMA molar fractions (**BP1-BP5**), P(DMA-co-HCCME)-*b*-PMMA (**BP7**), P(DMA-co-HCCME)-*b*-PDPA (**BP8**), P(DMA-co-HCCME)-*b*-PS (**BP9**), and P(DMA-co-HCCME)-*b*-PDEA (**BP10**) by sequential RAFT polymerizations.

**Table S1. Intensity-Average Hydrodynamic Diameter,  $\langle D_h \rangle$ , Polydispersity Index,  $pK_a$ , and Zeta Potentials ( $\xi$ ) of Micelles Self-Assembled from Diblock Copolymers.**

| Entry       | $\langle D_h \rangle$ (nm) <sup>a</sup> | PDI <sup>a</sup> | $pK_a$ <sup>b</sup> | $\xi$ (mV) <sup>c</sup> |
|-------------|-----------------------------------------|------------------|---------------------|-------------------------|
| <b>BP1</b>  | 34.8                                    | 0.054            | 6.73                | -2.7                    |
| <b>BP2</b>  | 30.4                                    | 0.054            | 6.51                | -3.7                    |
| <b>BP3</b>  | 41.6                                    | 0.099            | 6.12                | -4.5                    |
| <b>BP4</b>  | 37.6                                    | 0.10             | 5.92                | -6.2                    |
| <b>BP5</b>  | 35.6                                    | 0.20             | 5.57                | -5.6                    |
| <b>BP6</b>  | 24.2                                    | 0.11             | 6.12                | -5.8                    |
| <b>BP7</b>  | 108.0                                   | 0.21             | /                   | -24.0                   |
| <b>BP8</b>  | 32.8                                    | 0.13             | 6.30                | -6.7                    |
| <b>BP9</b>  | 31.2                                    | 0.23             | /                   | -21.4                   |
| <b>BP10</b> | 35.4                                    | 0.044            | 7.07                | 5.8                     |

<sup>a</sup> Determined by DLS at a copolymer concentration of 1.0 g/L and pH 7.4; <sup>b</sup> Determined by pH titration experiments; <sup>c</sup> Zeta potentials were determined by Malvern Zetasizer Nano ZS at copolymer concentrations of 0.5 g/L in PBS buffer (pH 7.4). Note: all data were averaged over three measurements.

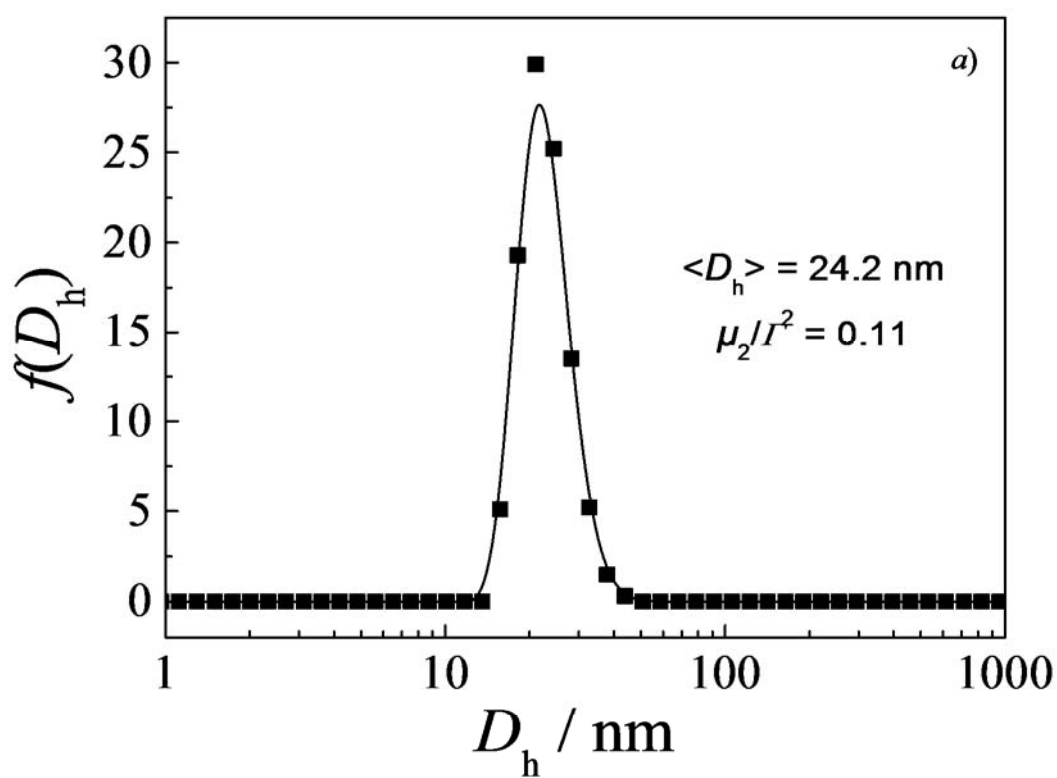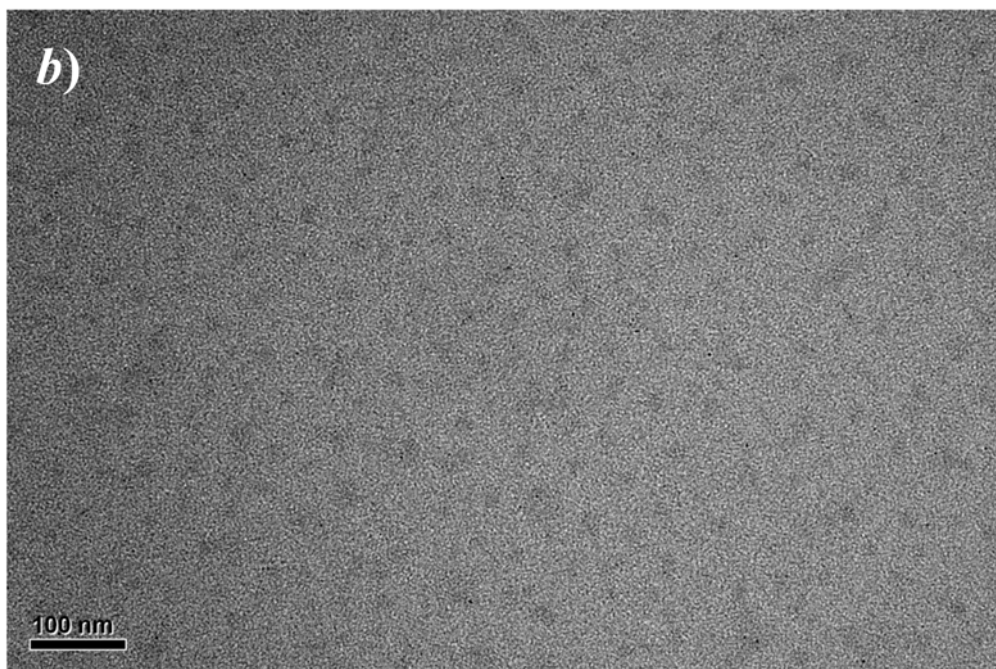

**Figure S1.** Typical (a) hydrodynamic diameter distribution,  $f(D_h)$ , and (b) TEM image recorded for **BP6** micelles (0.2 g/L, pH 7.4).

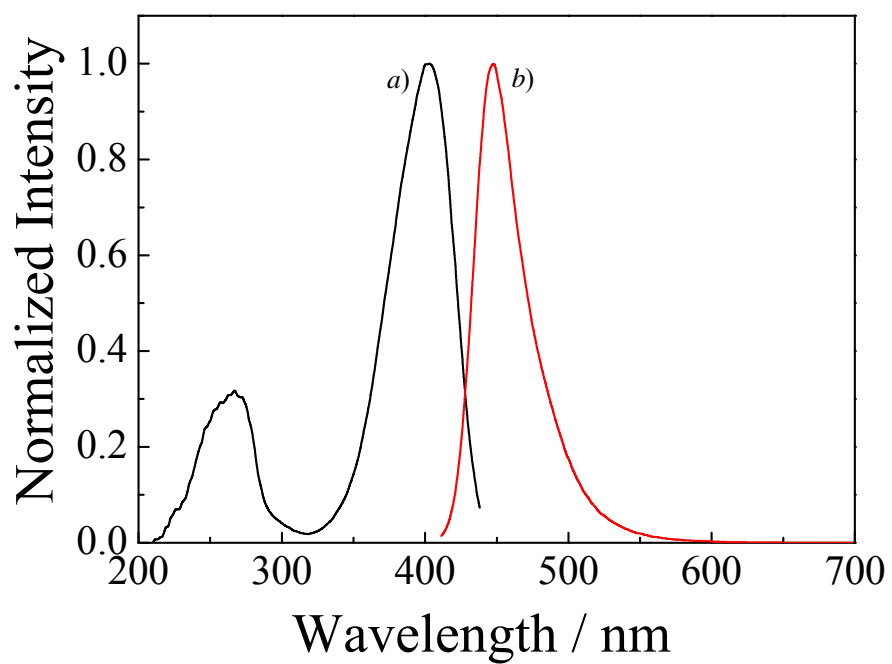

**Figure S2.** Normalized fluorescence (a) excitation and (b) emission spectra recorded for the aqueous solution of **P1** (pH 9.0; 0.018 g/L, [HCCME] =  $1.0 \times 10^{-6}$  M; slit widths: Ex. 2.5 nm, Em. 2.5 nm).

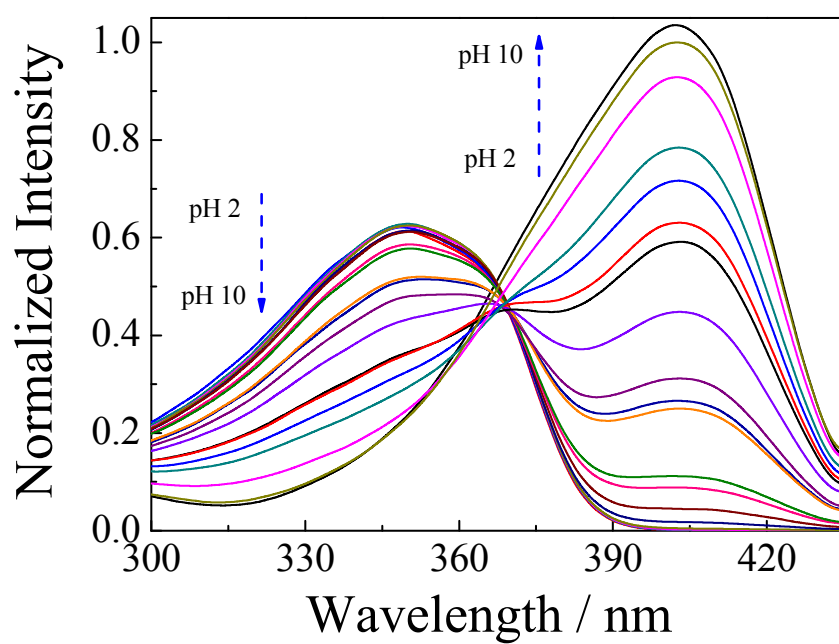

**Figure S3.** Normalized fluorescence excitation spectra ( $\lambda_{\text{em}} = 447$  nm, slit widths: Ex. 2.5 nm, Em. 2.5 nm) recorded for the aqueous solution of **P1** (0.018 g/L, [HCCME] =  $1.0 \times 10^{-6}$  M) in the pH range of 2-10.

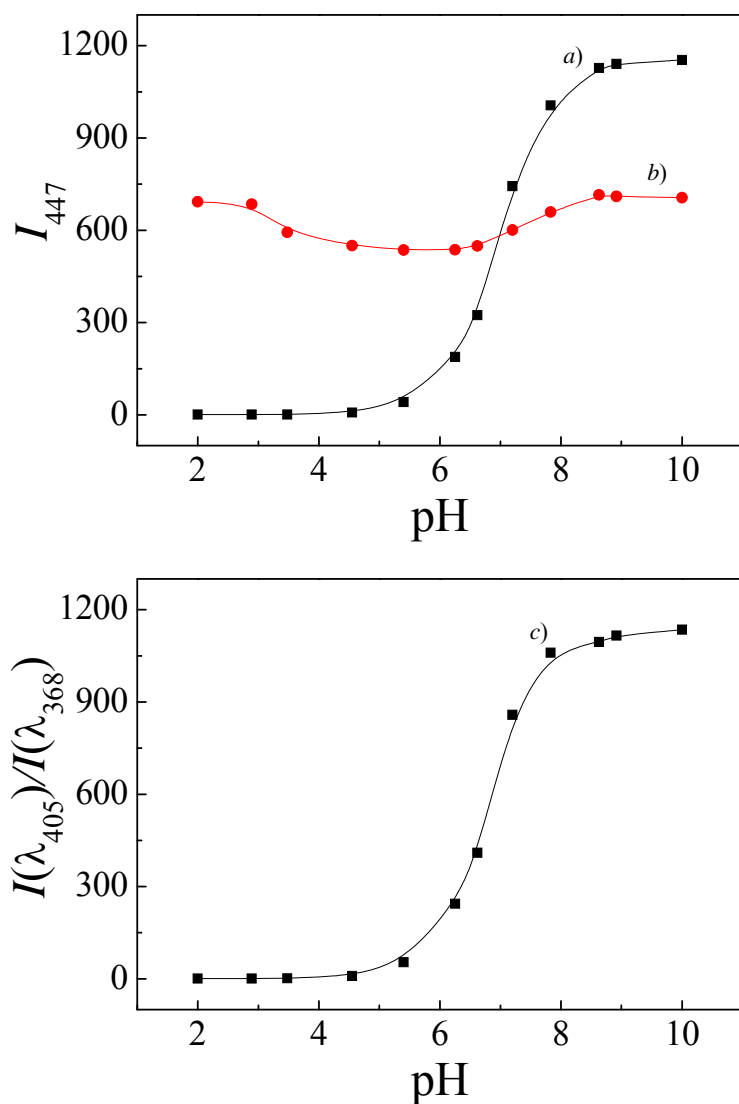

**Figure S4.** Relative fluorescence emission intensity changes excited at (a) 405 nm ( $\lambda_{em} = 447$  nm) and (b) 368 nm ( $\lambda_{em} = 447$  nm) recorded for the aqueous solution of **P1** (0.018 g/L, [HCCME] =  $1.0 \times 10^{-6}$  M) in the pH range of 2-10. (c) Normalized fluorescence intensity ratio changes,  $I(\lambda_{405})/I(\lambda_{368})$ , recorded for the aqueous solution of **P1** in the pH range of 2-10.  $I(\lambda_{405})$  and  $I(\lambda_{368})$  refer to the fluorescence intensities at 447 nm when excited at 405 nm and 368 nm, respectively.

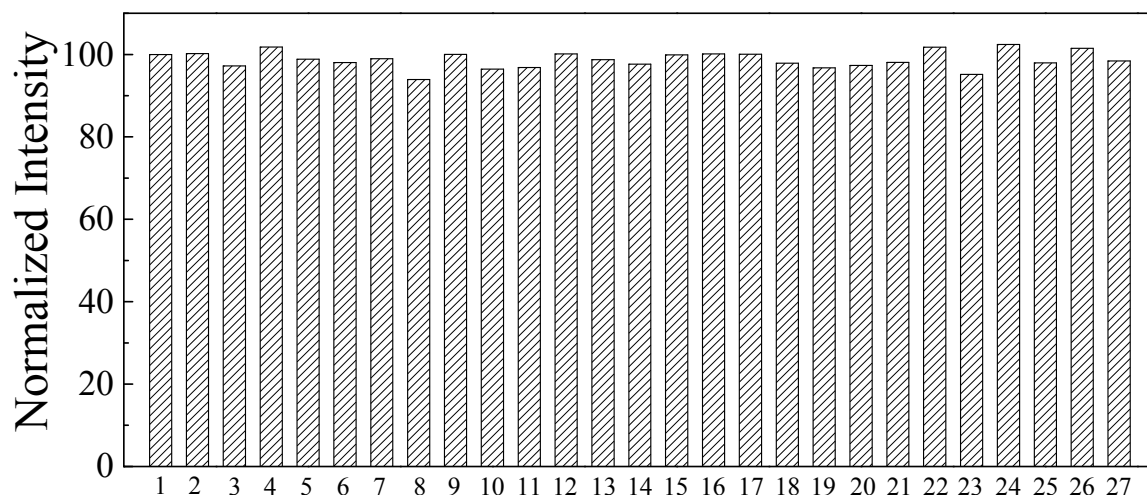

**Figure S5.** Fluorescent emission intensities recorded at 447 nm for aqueous solutions of **P1** (0.018 g/L, [HCCME] =  $1.0 \times 10^{-6}$  M) in the presence of 1 mM (2)  $\text{Ag}^+$ , (3)  $\text{Al}^{3+}$ , (4)  $\text{Ca}^{2+}$ , (5)  $\text{Cu}^{2+}$ , (6)  $\text{Mg}^{2+}$ , (7)  $\text{Pb}^{2+}$ , (8)  $\text{Zn}^{2+}$ , (9)  $\text{H}_2\text{O}_2$ , (10) *L*-cysteine, (11) *L*-phenylalanine, (12) *L*-alanine, (13) glycine, (14) *L*-lysine, (15) *L*-tyrosine, (16) *L*-tryptophan, (17) *L*-aspartic acid, (18) *L*-histidine, (19) glucose, and (20) mannose, respectively, or in the presence of 0.01 g/L (21) lipase, (22) glucose oxidase, (23) acid phosphatase, (24) amylase, (25) alkaline phosphatase, (26) lysozyme, and (27) trypsin. The mixture was incubated at 37 °C for 1 h prior to fluorescence measurement. Column 1 was taken as the control.

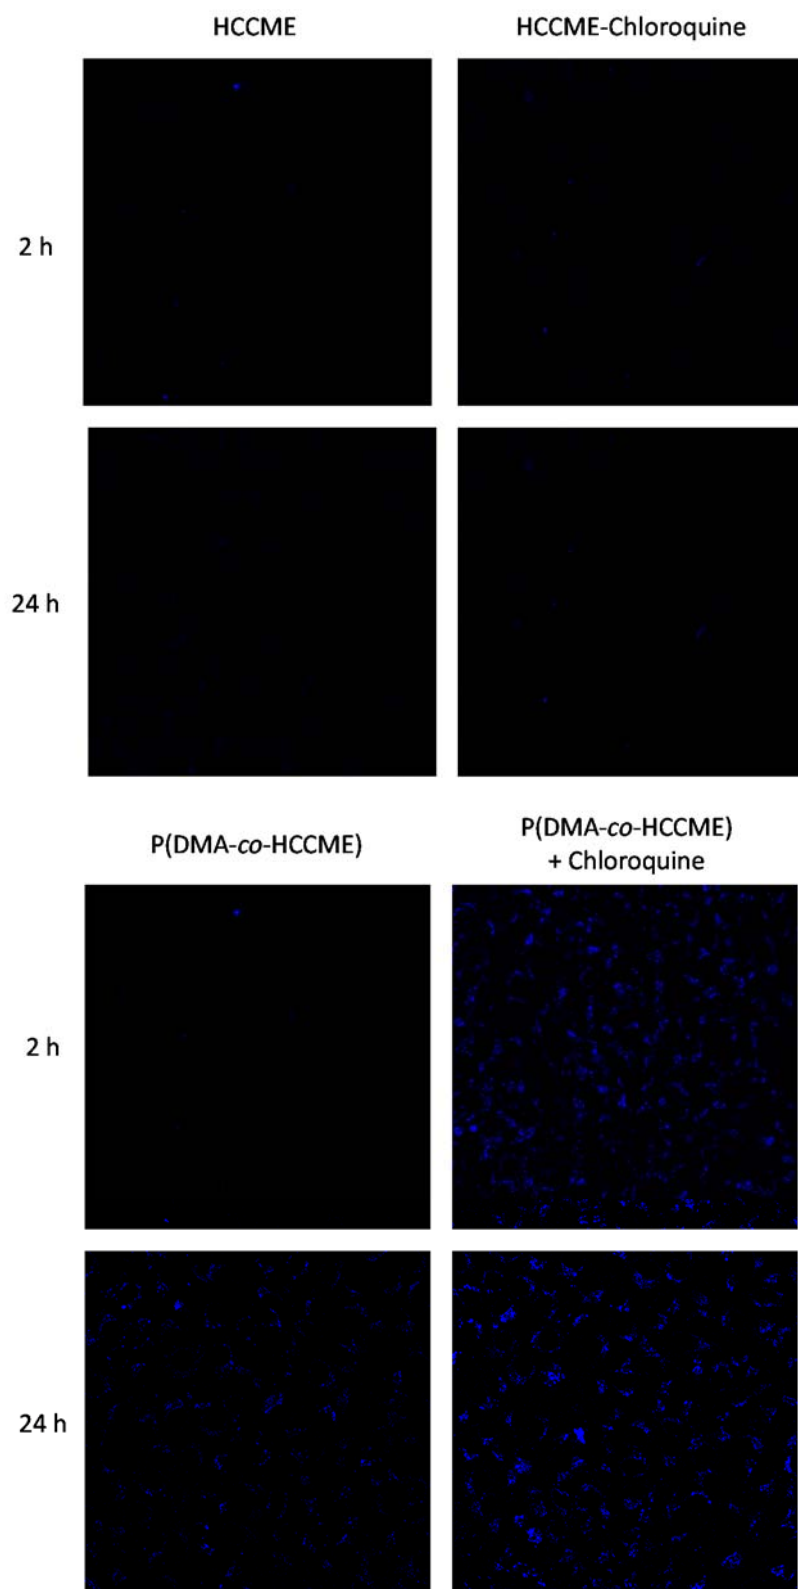

**Figure S6.** CLSM images recorded for live HepG2 cells after incubating with (top) HCCME and (bottom) **P1** (0.018 g/L, [HCCME] =  $1.0 \times 10^{-6}$  M) in the (left) absence and (right) presence of chloroquine (100  $\mu$ M) at 37 °C for 2 h and 24 h, respectively.

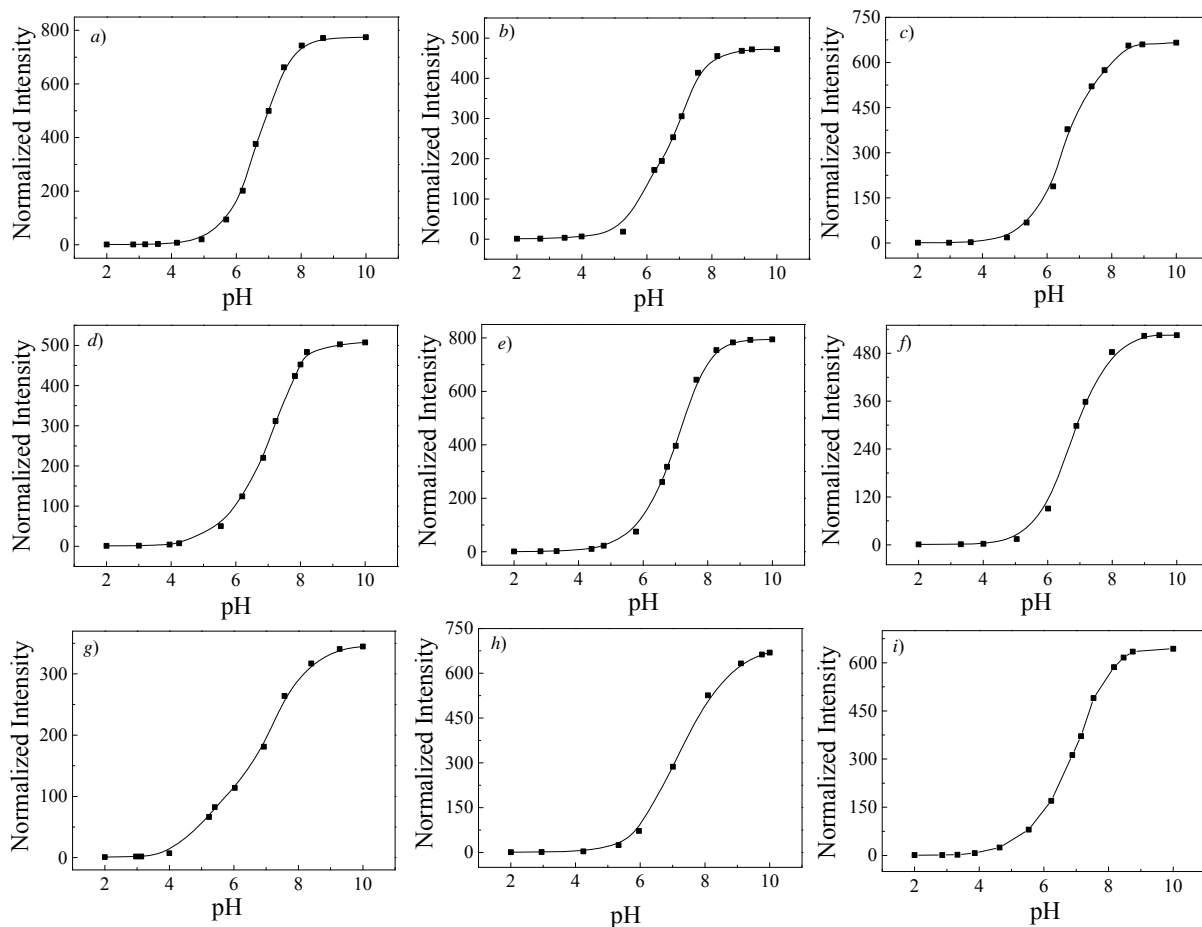

**Figure S7.** Normalized fluorescence emission intensity changes ( $\lambda_{\text{ex}} = 405 \text{ nm}$ ,  $\lambda_{\text{em}} = 447 \text{ nm}$ ) recorded for aqueous solutions of (a) **BP1**, (b) **BP2**, (c) **BP3**, (d) **BP4**, (e) **BP5**, (f) **BP7**, (g) **BP8**, (h) **BP9**, and (i) **BP10** in the pH range of 2-10, respectively. In all cases, the concentration of HCCME moieties was fixed at  $1.0 \times 10^{-6} \text{ M}$ .

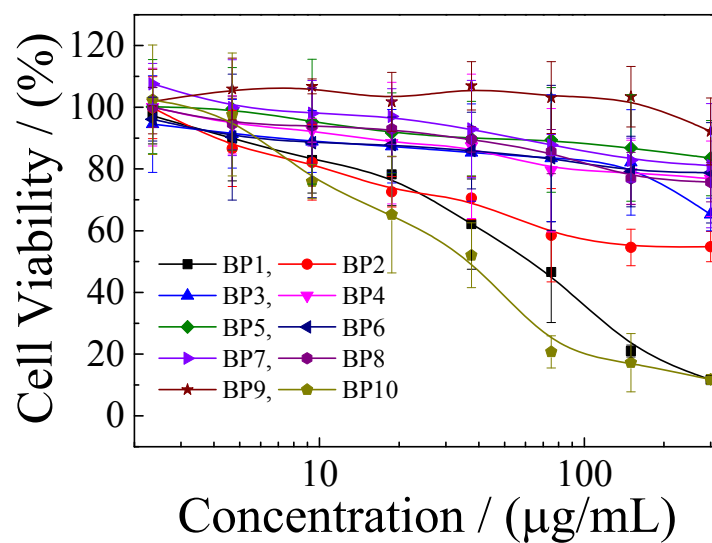

**Figure S8.** *In vitro* cytotoxicity of **BP1-10** micelles determined by MTT assay against HepG2 cells. The data represent a single experiment performed in quadruple with the error bars denoting the standard deviation.

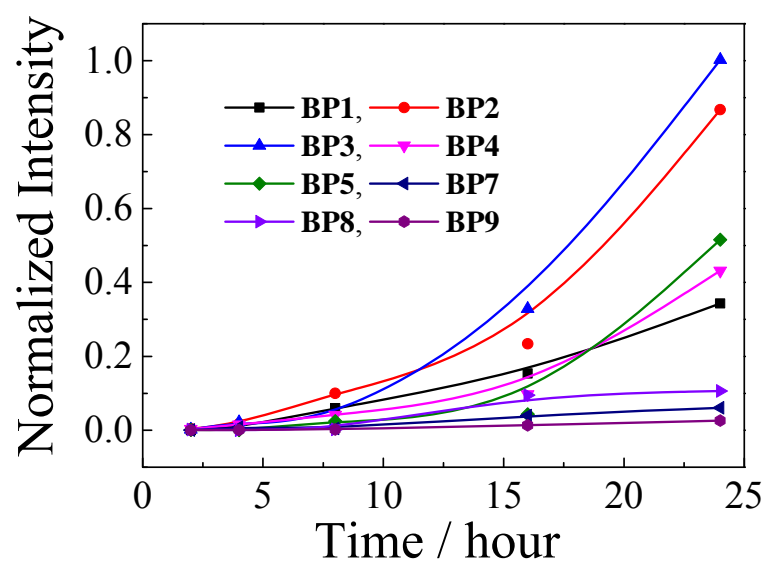

**Figure S9.** Time-dependent relative changes in intracellular fluorescence intensities recorded for **BP1-5** and **BP7-9** micellar dispersions, respectively. In all cases, the concentration of HCCME moieties was fixed at  $1.0 \times 10^{-6}$  M.

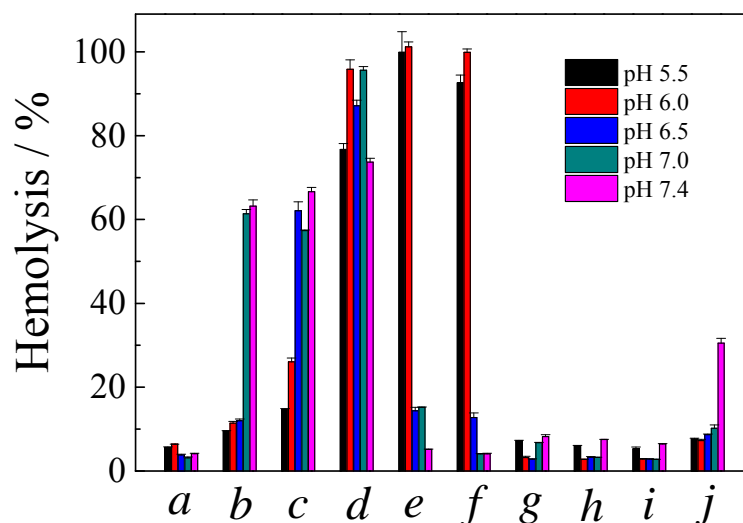

**Figure S10.** Hemolysis dose-response curves recorded for aqueous solutions (20  $\mu\text{g/mL}$ ) of (a) **P1**, (b) **BP1** (c) **BP2**, (d) **BP3**, (e) **BP4**, (f) **BP5**, (g) **BP7**, (h) **BP8**, (i) **BP9**, and (j) **BP10** at varying pH conditions. PBS (10 mM phosphate, 150 mM NaCl, pH 7.4) and Triton X-100 (1% v/v) were used as negative and positive controls, respectively. The data represent a single experiment performed in triplicate with the error bars denoting the standard deviation.

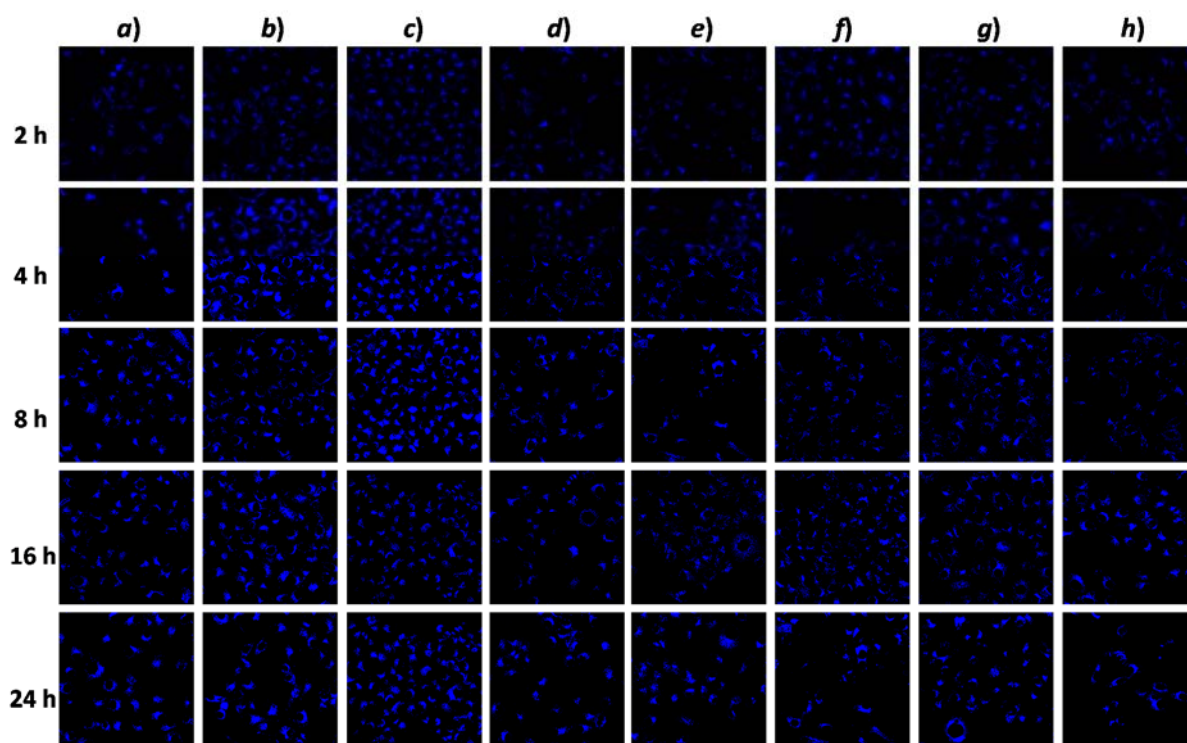

**Figure S11.** CLSM images recorded for live HepG2 cells incubated at 37 °C for varying times with (a) **BP1**, (b) **BP2**, (c) **BP3**, (d) **BP4**, (e) **BP5**, (f) **BP7**, (g) **BP8**, and (h) **BP9**, respectively. The cells were further treated with chloroquine (100  $\mu$ M) and incubated at 37 °C for 1 h before recording fluorescence images. In all cases, the concentration of HCCME moieties was fixed at  $1.0 \times 10^{-6}$  M.

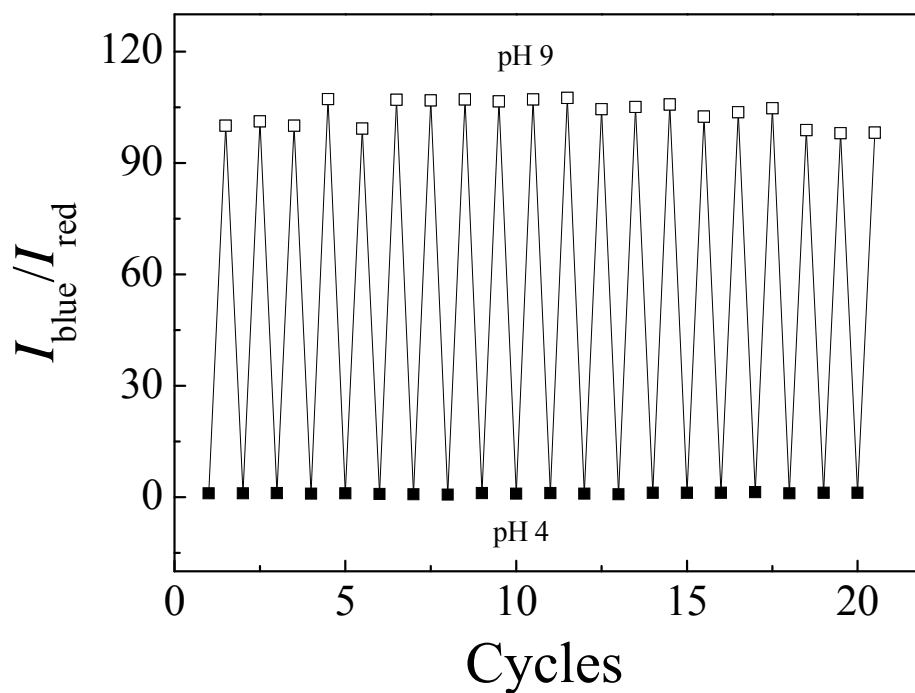

**Figure S12.** Emission intensity ratio changes ( $I_{\text{blue}}/I_{\text{red}}$ ) recorded for the aqueous solution (0.049 g/L) of **BP6** ( $\lambda_{\text{ex}} = 405$  nm for HCCME and  $\lambda_{\text{ex}} = 543$  nm for TMR; slit widths: Ex. 2.5 nm, Em. 2.5 nm; [HCCME] =  $1.0 \times 10^{-6}$  M, [TMR] =  $1.6 \times 10^{-6}$  M) when the solution pH was cycled between 4 and 9.

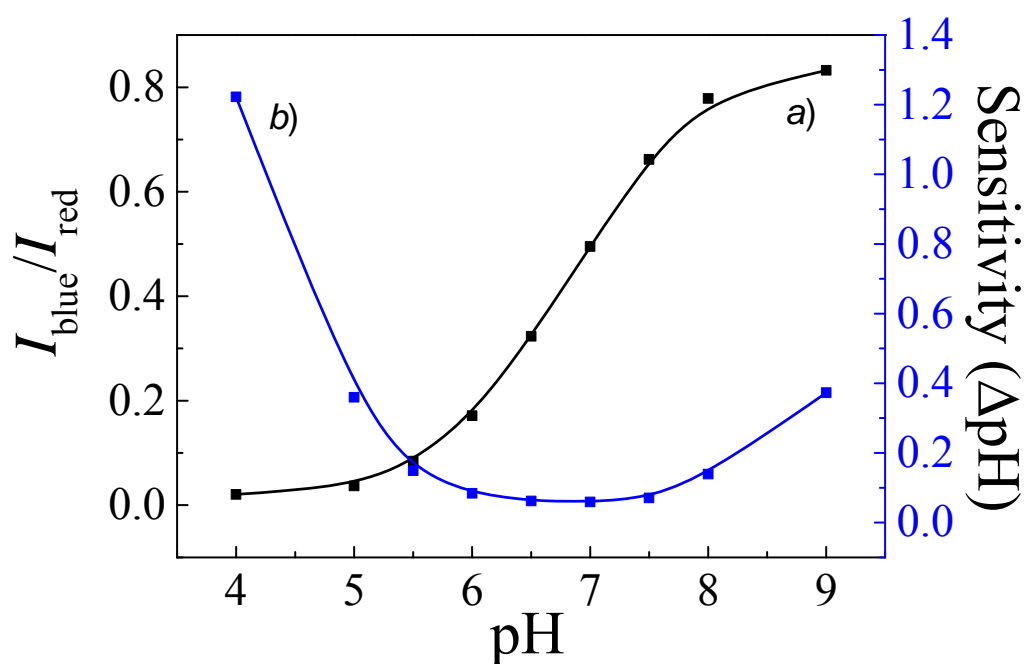

**Figure S13.** (a) Changes in fluorescence intensity ratios ( $I_{\text{blue}}/I_{\text{red}}$ ) and (b) detection sensitivity for **BP6** aqueous solution (0.049 g/L, [HCCME] =  $1.0 \times 10^{-6}$  M, [TMR] =  $1.6 \times 10^{-6}$  M) with excitation at 405 nm and collected between 420-470 nm for the blue channel and excitation at 543 nm and collected between 555-595 nm for the red channel.
